# Supplementary material
Source: publisher site journal article supplement (https://www.dovepress.com/article/381018)
Supplement: Supplementary file 1 [file get_supplementary_file.php]

**Supplemental Table 1:** Search strategy for included databases

| **Pubmed** | (("status epilepticus"[MeSH Terms] OR ("status"[All Fields] AND "epilepticus"[All Fields]) OR "status epilepticus"[All Fields] OR (("refractories"[All Fields] OR "refractoriness"[All Fields] OR "refractory"[All Fields]) AND ("status epilepticus"[MeSH Terms] OR ("status"[All Fields] AND "epilepticus"[All Fields]) OR "status epilepticus"[All Fields])) OR ("new"[All Fields] AND ("age of onset"[MeSH Terms] OR ("age"[All Fields] AND "onset"[All Fields]) OR "age of onset"[All Fields] OR "onset"[All Fields] OR "onsets"[All Fields] OR "onsetting"[All Fields]) AND ("refractories"[All Fields] OR "refractoriness"[All Fields] OR "refractory"[All Fields]) AND ("status epilepticus"[MeSH Terms] OR ("status"[All Fields] AND "epilepticus"[All Fields]) OR "status epilepticus"[All Fields])) OR "NORSE"[All Fields] OR "SE"[All Fields] OR "RSE"[All Fields]) AND ("coronavirus"[MeSH Terms] OR "coronavirus"[All Fields] OR "coronaviruses"[All Fields] OR ("sars cov 2"[MeSH Terms] OR "sars cov 2"[All Fields] OR "sars cov 2"[All Fields]) OR ("covid 19"[All Fields] OR "covid 19"[MeSH Terms] OR "covid 19 vaccines"[All Fields] OR "covid 19 vaccines"[MeSH Terms] OR "covid 19 serotherapy"[All Fields] OR "covid 19 serotherapy"[Supplementary Concept] OR "covid 19 nucleic acid testing"[All Fields] OR "covid 19 nucleic acid testing"[MeSH Terms] OR "covid 19 serological testing"[All Fields] OR "covid 19 serological testing"[MeSH Terms] OR "covid 19 testing"[All Fields] OR "covid 19 testing"[MeSH Terms] OR "sars cov 2"[All Fields] OR "sars cov 2"[MeSH Terms] OR "severe acute respiratory syndrome coronavirus 2"[All Fields] OR "ncov"[All Fields] OR "2019 ncov"[All Fields] OR (("coronavirus"[MeSH Terms] OR "coronavirus"[All Fields] OR "cov"[All Fields]) AND 2019/11/01:3000/12/31[Date - Publication])))) AND (2019/12/1:2021/12/1[pdat]) |
| --- | --- |
| **Google Scholar** | (status epilepticus OR refractory status epilepticus OR new onset refractory status epilepticus OR NORSE OR SE OR RSE) AND (coronavirus OR SARS-COV-2 OR covid-19) |
| **CNKI** | (status epilepticus OR refractory status epilepticus OR new onset refractory status epilepticus OR NORSE OR SE OR RSE) AND (coronavirus OR SARS-COV-2 OR covid-19) |
| **LILACS** | status epilepticus OR refractory status epilepticus OR new onset refractory status epilepticus OR NORSE |

*CNKI: China Academic Journals, LILACS: Latin American and Caribbean Literature on Health Sciences*

**Supplemental Table 2:** Quality assessment of included studies (n=11).

| # | Author | Was the study question or objective clearly stated? | Was the study population clearly and fully described, including a case definition? | Were the cases consecutive? | Were the subjects comparable? | Was the intervention clearly described? | Were the outcome measures clearly defined, valid, reliable, and implemented consistently across all study participants? | Was the length of follow-up adequate? | Were the statistical methods well described? | Were the results well described? | Total | Level of Evidence |
| --- | --- | --- | --- | --- | --- | --- | --- | --- | --- | --- | --- | --- |
| 1 | Belluzo et al. [21] | yes | yes | Yes | yes | yes | yes | yes | no | N/A | 7 | Good |
| 2- | Najjar et al [26] | yes | yes | Yes | yes | no | no | no | N/A | N/A | 4 | Fair |
| 3 | Monti et al.[27] | yes | yes | N/A | N/A | yes | yes | yes | N/A | N/A | 5 | Fair |
| 4 | Dono et al [28] | yes | yes | N/A | N/A | yes | yes | yes | N/A | N/A | 5 | Fair |
| 5 | Hwang et al [25] | yes | yes | Yes | yes | Yes | yes | no | no | N/A | 6 | Good |
| 6 | Somani et al. [29] | yes | yes | Yes | yes | yes | yes | N/A | N/A | N/A | 6 | Good |
| 7 | Karvigh et al. [30] | yes | yes | N/A | N/A | yes | yes | yes | N/A | N/A | 5 | Fair |
| 8 | mangonotti et al. [31] | yes | yes | Yes | yes | yes | yes | yes | N/A | N/A | 7 | Good |
| 9 | marshall et al. [32] | yes | yes | N/A | N/A | Yes | yes | yes | N/A | N/A | 5 | Fair |
| 10 | leelamani et al. [33] | yes | yes | N/A | N/A | yes | yes | yes | N/A | N/A | 5 | Fair |
| 11 | Mendoza et al. [34] | yes | yes | N/A | N/A | yes | yes | yes | N/A | N/A | 5 | Fair |

**Supplemental Table 3:** Summary of included studies.

| **S.No** | **Author name** | **No of patients** | **Case(s) summary** |
| --- | --- | --- | --- |
| 1 | Belluzo et al  [21] | 1 | An 81-year-old female became COVID-19 positive as a consequence of disease spreading among her relatives. One week later, she developed fever and confusion. Three days after hospital admission she became suddenly unresponsive. EEG showed abundant 1- to 2.5-Hz generalized sharp/triphasic waves predominant on the left fronto-parietal region, concerning for nonconvulsive SE (NCSE). The patient was given multiple ASMs: levetiracetam, valproic acid, brivaracetam. EEG monitoring did not document changes in the epileptic activity; therefore, steroid treatment followed by intravenous immunoglobulins and the adoption of ketogenic diet (ratio 4:1) was tried. Despite these improvements, the patient remained drowsy, with a limited ability to interact with her surroundings and was eventually discharged to a nursing home for dependent people. |
| 2 | Najjar et al  [26] |  | A 71-year-old SARS-CoV-2 positive female presented with altered mental status necessitating intubation. While on sedation, she was witnessed to have a convulsive seizure. Despite continued sedation with Diprivan and treatment with anti-seizure medications, EEG showed prolonged runs of 2 Hz GPDs concerning for refractory non-convulsive status epilepticus associated with a peak. Patient remains on follow-up. |
| 3 | Monti et al  [27] | 1 | A 50-year-old man, presented on February 23rd an acute onset of psychiatric symptoms (confabulations and delirious ideas). He had fever (T 38 °C) without increased CRP or leucocytosis, respiratory symptoms (in particular no cough, cold or dyspnea) or diarrhea. After 4 days, focal motor seizures with impaired awareness and oro-facial dyskinesia/automatisms appeared. He was treated with diazepam followed by adequate doses of valproic acid and lacosamide. Nevertheless, he suddenly developed a refractory status epilepticus (RSE) requiring admission to the intensive care unit (ICU) and anesthetics’ treatment. Search for the main neurotropic fungi, bacteria and viruses was negative. Then on March the 3rd a throat swab for Covid-19 was acquired and PCR confirmed Covid-19 infection. immunomodulating therapies (metilprednisolone, IGIV, plasma-exchange) together with antiseizure drugs/anesthetics to control refractory/super refractory status (SRSE), were started. Forty-seven days from the beginning of SE and after having completed the first cycle of plasma-exchange and a second cycle of IGIV, seizures definitely ceased thus anesthetic therapy was stopped. Four months after the onset the patient was discharged at home in good condition, autonomous, and without neurological deficits. |
| 4 | Dono et al  [28] | 1 | 81-year-old man was admitted to the Emergency Department, due to persistent fever, mild dyspnea, and dry coughing started 7 days before the admission. Oropharyngeal and nasopharyngeal swabs were positive for SARS-CoV-2 infection. Subsequently patient was managed, and a negative swab was reported after 14 days. On day 16, patient became drowsy with Glasgow coma scale (GCS) of 5. Tests were done to exclude encephalopathic causes. Diagnosis of non-convulsive status epilepticus with coma was made, two intravenous (i.v.) boluses of Lorazepam 4 mg followed by a i.v. bolus of Levetiracetam 2000 mg and Perampanel 20 mg via nasogastric tube was made which didn’t show lasting improvement. After ICU and multiple testing panels, all came back negative, and the patient didn’t improve. The patient died on the 45th day due to cardiac arrest. |
| 5 | Hwang et al  [25] | 1 | A 68-year-old woman presented for diarrhea, fever, malaise, cough, and shortness of breath and found to be positive for COVID-19 3 days prior. The chest X-ray showed bilateral lung infiltrates for which she was treated with azithromycin, ceftriaxone, and hydroxychloroquine. At 2 weeks into her course, the patient remained obtunded off of sedation. EEG on day 17 showed severe generalized slowing. By day 27, she was extubated but remained confused, with the psychomotor slowed, and unable to follow commands. EEG on day 33 revealed unremitting high-amplitude centrotemporal sharp rhythmic 3–5-Hz activity concerning non-convulsive status epilepticus (NCSE). Clinical improvement was noted on the following day after the administration of IV lorazepam, levetiracetam, and lacosamide, with EEG transitioning to moderate background, slowing with intermittent left temporal sharp waves. By day 49, the patient was discharged to rehabilitation, alert and capable of conversation, though with moderate persistent cognitive and bilateral proximal weakness. |
| 6 | Somani et al  [29] | 1 | A 73-year-old right-handed AA woman with a known history of hypertension, diabetes mellitus, and chronic kidney disease presented to the UAB emergency room with shortness of breath, lower extremity edema, and confusion. Chest X-ray demonstrated patchy bilateral opacities and serum procalcitonin (0.53 ng/mL) was elevated. She was admitted to the intensive care unit with the diagnosis of sepsis. Next morning Myoclonic status epilepticus with coma (MSE) was diagnosed and treated with intravenous levetiracetam, lacosamide, phenytoin, and midazolam to achieve burst suppression for 48 hours. EEG improved however clinically the patient worsened, Tracheal aspirate tested positive for Covid-19 by RT-PCR. For the next 3 weeks, multiple attempts to arouse or extubate failed after sedatives were held. Care was withdrawn, and the patient expired. |
| 7 | Karvigh et al  [30] | 1 | A 73-year-old man presented with two seizures on the day of admission. The seizures were focal motor followed by secondary generalized tonic-clonic seizures. There was no systemic presentation of an infection and no meningeal irritation signs like headache or neck stiffness. The patient received loading and maintenance dose of levetiracetam which helped briefly. The EEG showed a focal ictal pattern in the left temporal leads with a slow background rhythm consistent with a focal nonconvulsive status epilepticus. Valproate loading dose helped the patient to recover to his normal baseline cognitive and language state. Unfortunately, after 12 h, there was a recurrence of symptoms despite optimal antiepileptic serum levels. After IV phenytoin administration, there was no improvement in the patient’s condition, and the EEG findings aggravated and evolved into bilaterally independent lateralized periodic discharges and occasional EEG ictal pattern. Tests to diagnose the etiology were done which all came back negative. On the third day of admission, the level of consciousness decreased and fine clonic jerks were noted in the left side of the face. The patient was intubated, and a more aggressive antiepileptic treatment was applied with the impression of “refractory nonconvulsive status epilepticus in coma. Meanwhile, the 2019-nCoV RT-PCR test showed the presence of the virus in both pharyngeal mucosa and the CSF. During the following days, there was no significant systemic finding related to COVID-19 disease. After a week, the patient recovered partially, could open his eyes, and obeys one step command without new seizures nor focal neurological deficits |
| 8 | Manganotti et al  [31] | 2 | Two patients, 37 and 71 years old respectively admitted to the hospital affected by bilateral pneumonia due to the novel Covid-19 infection from March to December 2020 diagnosed by a positive nasopharyngeal swab test. The patients presented (one at the admission and one after 11 days of hospitalization) clinical seizures or reduced vigilance and altered mental status, suggestive of a diagnosis of status epilepticus (SE). CSF culture and polymerase chain reaction (PCR) for possible organisms came back negative. Due to the lack of response to the antiepileptic drugs, all the patients were compatible with a possible autoimmune encephalitis-related NORSE diagnosis and they were treated with IVIG. |
| 9 | Marshall et al  [32] | 1 | A 50-year-old Caucasian woman was admitted with COVID-19 infection. Hospital course was complicated by respiratory failure requiring intubation, septic shock, acute kidney injury and elevated interleukin-6 level. The sepsis was successfully treated. But on Hospital Day 37, after weaning of her sedation, this patient who previously had a normal neurological exam, was now opening her eyes to noxious stimuli only with severely depressed mental status. Within the following 24 hours, she started having generalized tonic-clonic seizures. Therapy with lorazepam, four doses of 4mg IV, propofol infusion, phosphenytoin and levetiracetam failed to abort the seizures. Lacosamide and midazolam infusion were then sequentially added and were successful in terminating the seizures. |
| 10 | Leelamani et al  [33] | 1 | A young lady with no premorbid illness, was diagnosed as Covid-19 by PCR of nasal swab when she presented with cough and mild fever. 2 days later she developed sudden onset tonic posturing of both upper and lower limbs with uprolling of eyes. She was brought to emergency deparment where she had multiple episodes of fits. She was given diazepam and loading dose phenytoin. Since she was continuing to have seizures she was intubated. Simultaneously she was being given parenteral sodium valproate and Levetiracetam. After the patient was mechanically ventilated she was started on midazolam infusion. On second day she had recurrent seizures with twitching of face and mild clonic movements of hands. She was started on phenobarbital infusion on third day and continued on oral phenobarbitone. Still she continued to have subtle seizures. She was subsequently given propafol and thiopentone without much benefit. She continued to have seizures with multiple medications. She was started on ketamine also on day 10. As there was no clinical improvement regarding patient sensorium and seizure, we planned to give trial of immunoglobulin. She was given intravenous immunoglobulin at 0.4 g/kg for 5 days from day 10 of admission. After 2 days of starting of immunoglobulin no more seizures were noted and was eventually discharged. |
| 11 | Mendoz et al  [34] | 1 | A 23-year-old male, presented refractory convulsive status epilepticus (SE), preceded by febrile episodes, requiring non-barbituric sedation and admission to ICU. After multiple laboratory examinations, Nosocomial Covid-19 infection was diagnosed.  Patient presented with fever and seizures, despite anti-seizure drugs and barbituric sedation. Successive video-EEGs showed burst-suppression pattern alternating with multifocal seizures with left frontotemporal predominance, progressing to continuous SE when sedation was reduced. Methylprednisolone, IVIg, plasma exchange and tocilizumab were administered without response. Anakinra 5mg/kg/dose was started with dramatic improvement in level of consciousness and EEG, reverting SE pattern and withdrawing sedation;however, focal and focal to bilateral tonic-clonic seizures persisted daily. He is currently on third month in ICU and under valproate, brivaracetam, zonisamide, perampanel, ketogenic diet and cannabidiol. |
